# Supplementary material for: Cryo-EM structures of human m6A writer complexes
Source: PubMed Central journal article supplement (PMC9652331; doi:10.1038/s41422-022-00725-8), 2022-09-27
Supplement: 41422_2022_725_MOESM4_ESM.pdf [file 41422_2022_725_MOESM4_ESM.pdf]

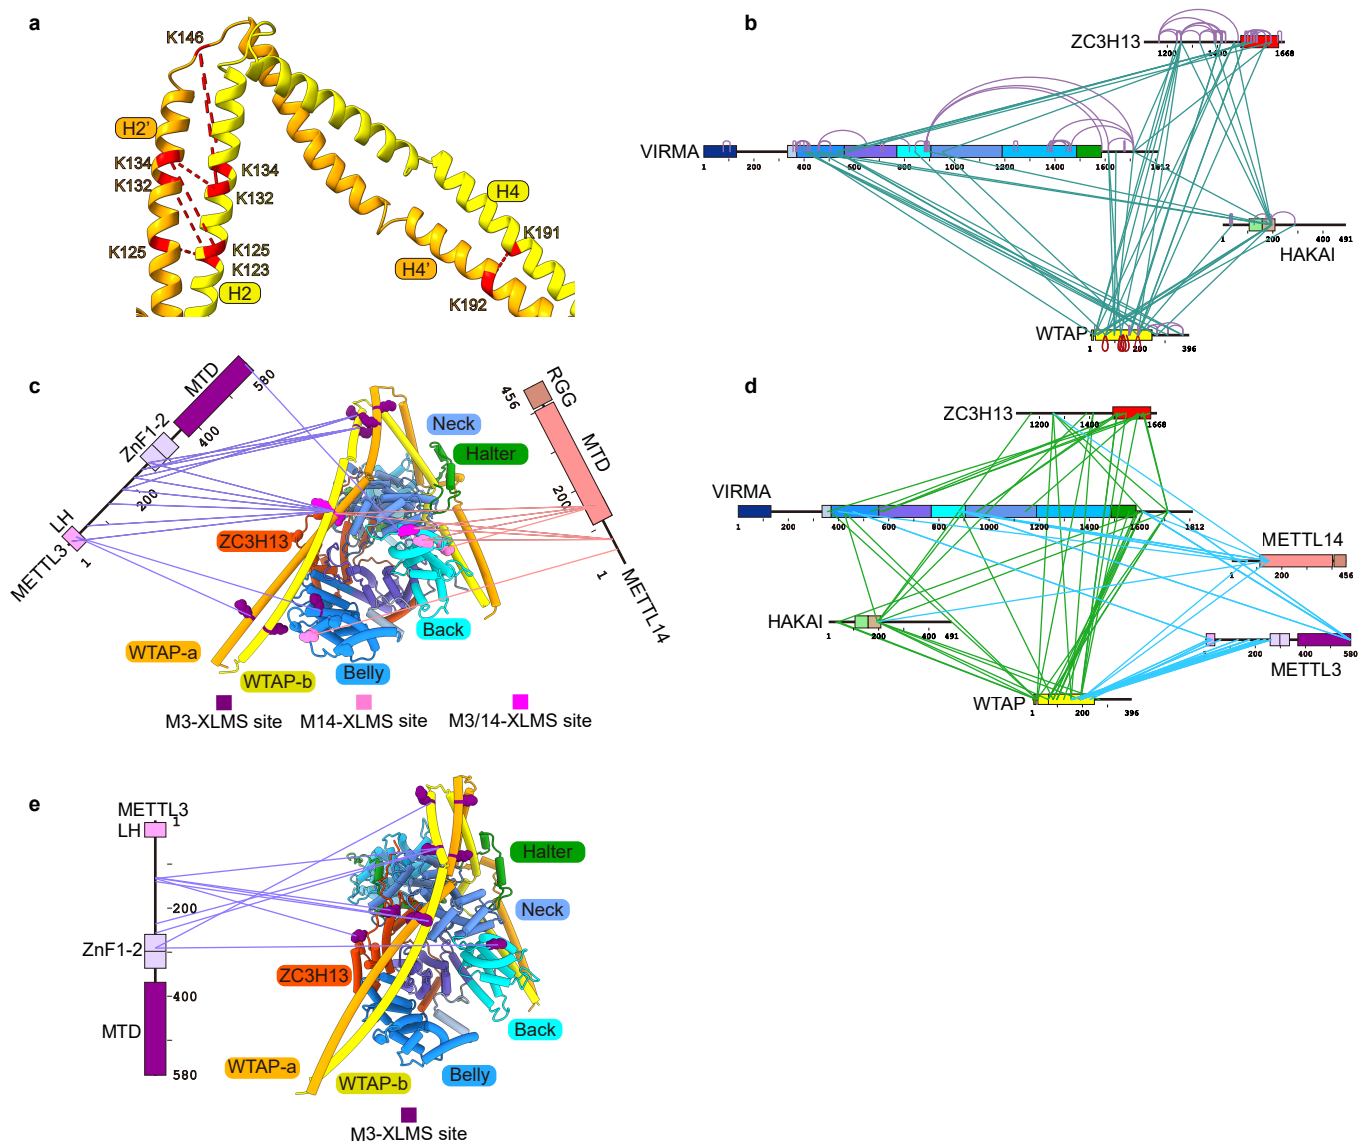

**Supplementary information, Fig. S4. XL-MS analysis of MACOM and m<sup>6</sup>A writer complex.** **a** Intermolecular cross-linking sites of the WTAP homodimer. The paired cross-linking residues are colored in red and linked by a red dash line. **b** Schematic summary of BS3-cross-linking residues identified inter- and intra-molecular contacts in HWVZ complex. The intra- and inter-molecular cross-linking residues are shown as solid line colored in medium-purple and sea-green, respectively. **c** The MAC-cross-linking residues with BS3 in the cryo-EM structure of the HWVZ complex. METTL3-cross-linking residues are colored in purple. METTL14-cross-linking residues are colored in pink. Residues cross-linked with both METTL3 and METTL14 are colored in violet. Schematics of METTL3 and METTL14 are shown on the left and right, respectively. Residues cross-linked with METTL3 and METTL14 are linked to the corresponding positions of METTL3 and METTL14. **d** Schematic summary of BS3-cross-linking residues that identified inter-molecular contacts in the m<sup>6</sup>A writer complex. The intermolecular cross-linking residues inside HWVZ complex are shown as solid line and colored in green, while those between METTL3/METTL14 and the HWVZ complex are colored in deep-sky-blue. **e** The MAC-cross-linking residues with EDC in the cryo-EM structure of the HWVZ complex. METTL3-cross-linking residues are colored in purple. The schematic of METTL3 is shown at the left.
