# Supplementary material for: Cryo-EM structures of human m6A writer complexes
Source: PubMed Central journal article supplement (PMC9652331; doi:10.1038/s41422-022-00725-8), 2022-09-27
Supplement: 41422_2022_725_MOESM5_ESM.pdf [file 41422_2022_725_MOESM5_ESM.pdf]

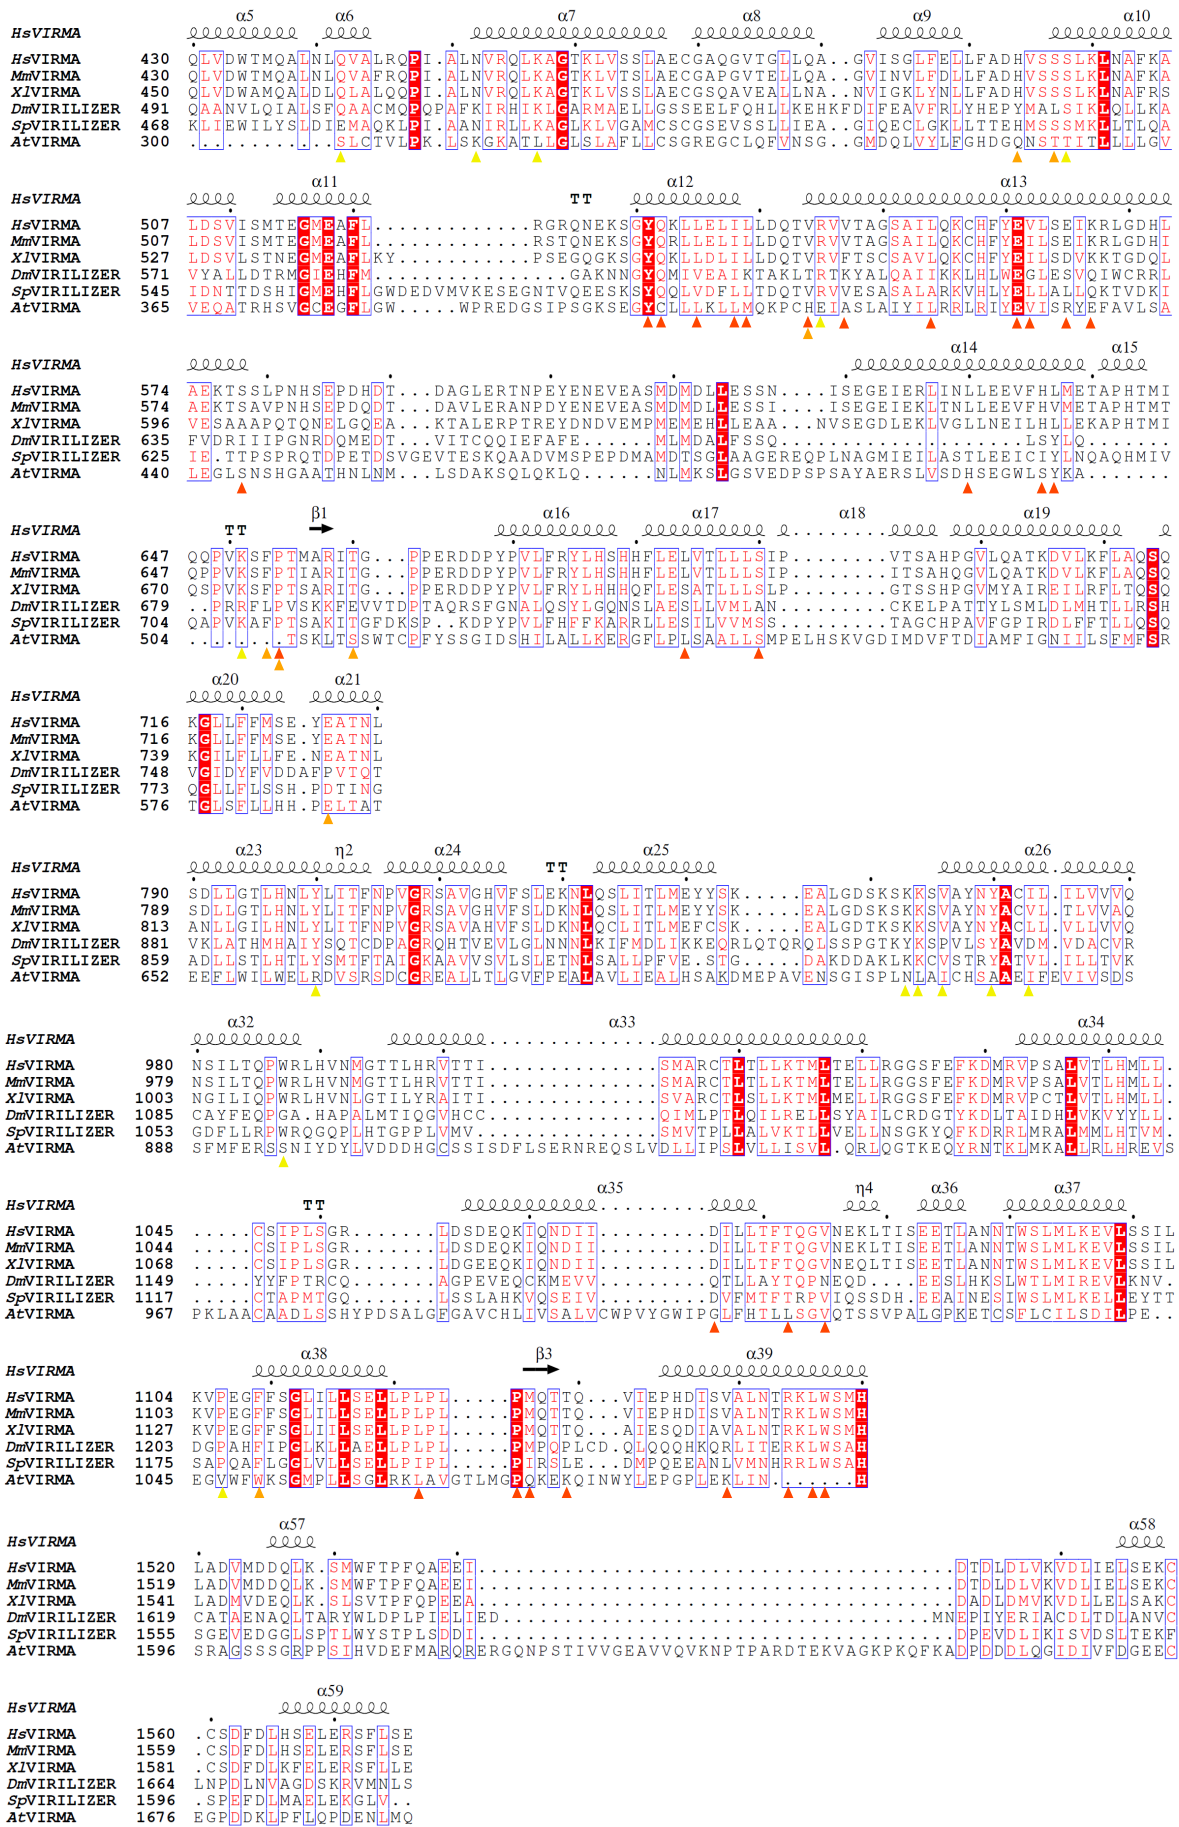

interaction protein ▲ ZC3H13 ▲ WTAP-a ▲ WTAP-b

**Supplementary information, Fig. S5. Comparison of sequences (Hs, Homo sapiens; Dr, Danio rerio; Xi, Xenopus laevis; Dm, Drosophila melanogaster; At, Arabidopsis thaliana) of the WTAP-interacting region in VIRMA. The up-triangles indicate the residues that interact with WTAP-a (orange), WTAP-b (yellow), and ZC3H13 (orange red).**
