# Supplementary material for: Cryo-EM structures of human m6A writer complexes
Source: PubMed Central journal article supplement (PMC9652331; doi:10.1038/s41422-022-00725-8), 2022-09-27
Supplement: 41422_2022_725_MOESM7_ESM.pdf [file 41422_2022_725_MOESM7_ESM.pdf]

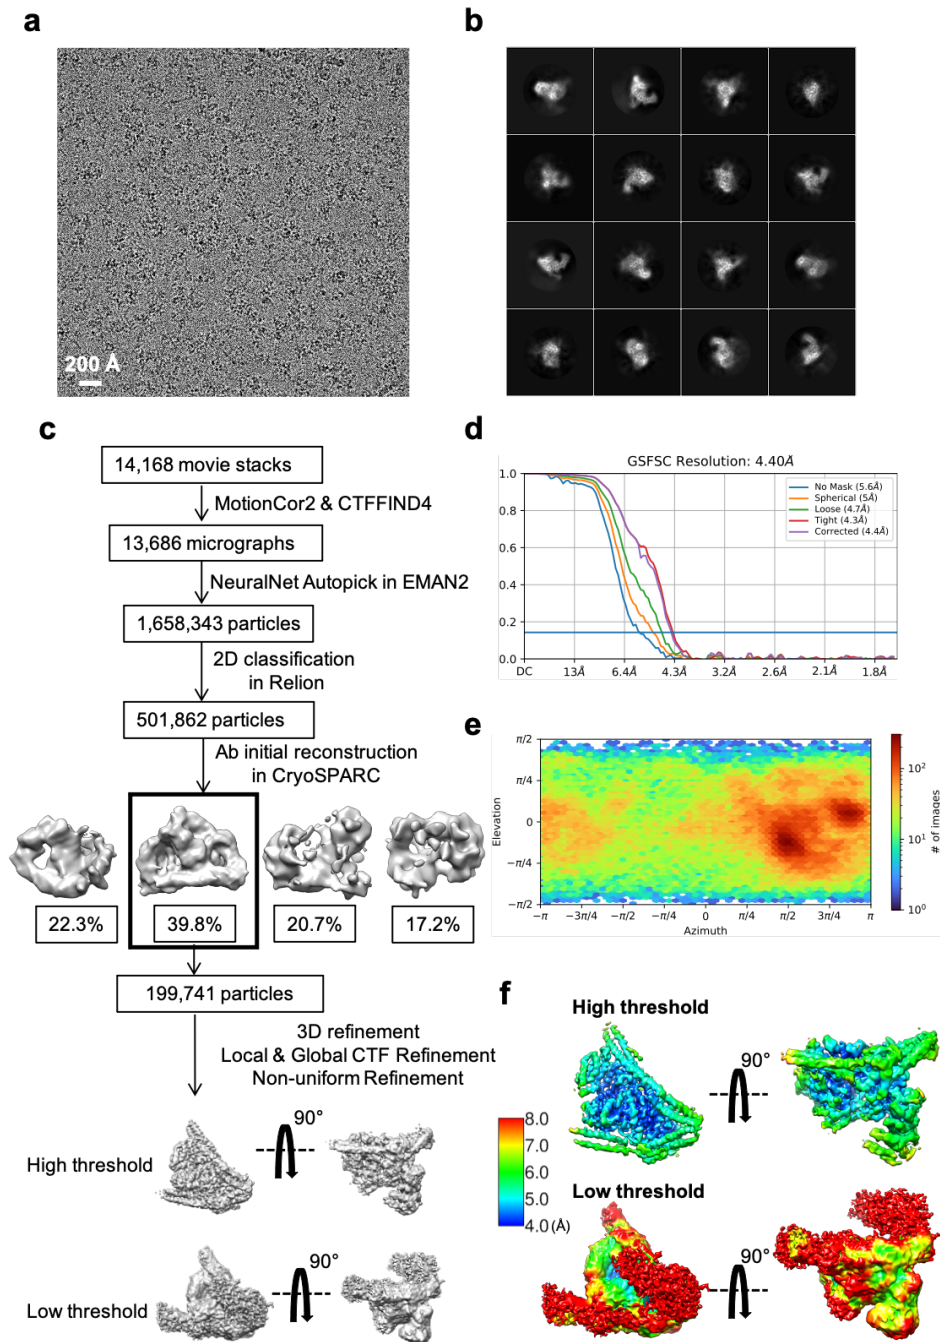

**Supplementary information, Fig. S7. Single-particle cryo-EM analysis of the MACOM/MAC complex.** **a** Representative motion-corrected cryo-EM micrograph. **b** Reference-free 2D class averages. **c** Workflow of the data processing. **d** Gold standard FSC plots calculated in cryoSPARC. **e** Euler angle distribution of the particle images. **f** Resolution map for the final 3D reconstruction at high and low threshold levels.
