# Supplementary material for: Cryo-EM structures of human m6A writer complexes
Source: PubMed Central journal article supplement (PMC9652331; doi:10.1038/s41422-022-00725-8), 2022-09-27
Supplement: 41422_2022_725_MOESM9_ESM.pdf [file 41422_2022_725_MOESM9_ESM.pdf]

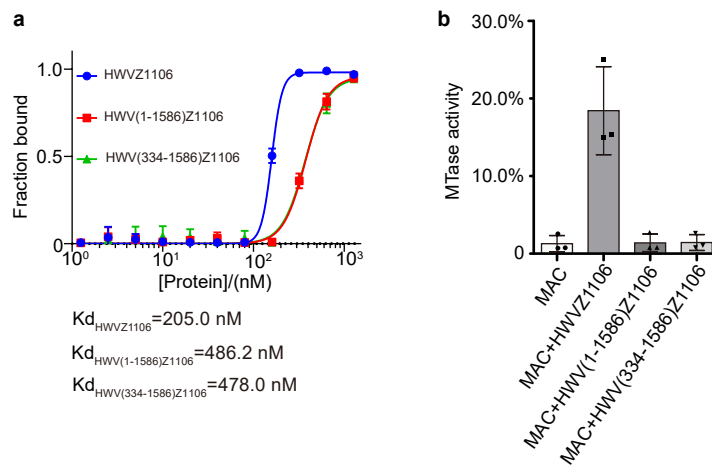

**Supplementary information, Fig. S9. The C-terminal of VIRMA plays a vital role in the process of m<sup>6</sup>A methylation.** The N-terminal region (1-333) before the visible region and C-terminal region (1587-1812) after the Halter domain were truncated for RNA binding and methylation assay. **a** The binding affinities of HWVZ<sup>(1106-1668)</sup>, HWV<sup>(1-1586)</sup>Z<sup>(1106-1668)</sup>, and HWV<sup>(334-1586)</sup>Z<sup>(1106-1668)</sup> complex with FAM-labeled actb-1 RNA from EMSA experiments. Binding curves were generated using the mean of three biologically independent experiments, with standard deviation (SD) values indicated by error bars (n = 3). **b** Actb-1 RNA N<sup>6</sup>-adenosine methylation activity of MAC, MAC/HWVZ<sup>(1106-1668)</sup>, MAC/HWV<sup>(1-1586)</sup>Z<sup>(1106-1668)</sup>, and MAC/HWV<sup>(334-1586)</sup>Z<sup>(1106-1668)</sup> complex. The bar chart was generated using the mean of three biologically independent experiments, with standard deviation (SD) values indicated by error bars (n = 3).
