# Supplementary material for: Cryo-EM structures of human m6A writer complexes
Source: PubMed Central journal article supplement (PMC9652331; doi:10.1038/s41422-022-00725-8), 2022-09-27
Supplement: 41422_2022_725_MOESM11_ESM.pdf [file 41422_2022_725_MOESM11_ESM.pdf]

**Table S1. Cryo-EM data collection, processing, and model validation**

|                                              | HWVZ                      | HWV                    | HWVZ+M3/14                |
|----------------------------------------------|---------------------------|------------------------|---------------------------|
| <b>Data collection and processing</b>        |                           |                        |                           |
| Microscope                                   | Titan Krios G3i           | Titan Krios G3i        | Titan Krios G3i           |
| Voltage (kV)                                 | 300                       | 300                    | 300                       |
| Camera                                       | Gatan K3                  | Gatan K3               | Gatan K3                  |
| Grids Type                                   | R2/1 Quantifoil<br>copper | R2/1 Quantifoil copper | R2/1 Quantifoil<br>copper |
| Sample concentration                         | 1.0 mg/mL                 | 1.0 mg/mL              | 1.0 mg/mL                 |
| Magnification                                | 105,000x                  | 105,000x               | 105,000x                  |
| C2 aperture size ( $\mu\text{m}$ )           | 70                        | 70                     | 70                        |
| Objective aperture size<br>( $\mu\text{m}$ ) | 100                       | 100                    | 100                       |
| Pixel size ( $\text{\AA}$ )                  | 0.82                      | 0.82                   | 0.82                      |
| Total exposure ( $\text{e}/\text{\AA}^2$ )   | 55.5                      | 55.5                   | 55.5                      |
| Exposure time (s)                            | 2.5                       | 2.5                    | 2.5                       |
| Number of frames per<br>exposure             | 30                        | 30                     | 30                        |
| Energy filter slit width<br>(eV)             | 20                        | 20                     | 20                        |
| Data collection software                     | EPU                       | EPU                    | EPU                       |
| Number of exposures per<br>hole              | 4                         | 4                      | 4                         |
| Defocus range ( $\mu\text{m}$ )              | -1.1 to -3.3              | -0.8 to -3.2           | -1.0 to -3.5              |
| Number of micrographs<br>collected           | 12,745                    | 7,642                  | 14,168                    |
| Number of micrographs<br>used                | 12,372                    | 7,617                  | 13,686                    |
| Number of initial particles                  | 1,992,194                 | 682,368                | 1,658,343                 |
| Symmetry                                     | C1                        | C1                     | C1                        |
| Number of final particles                    | 395,916                   | 282,821                | 199,741                   |

|                           |       |       |     |
|---------------------------|-------|-------|-----|
| Clashscore, all atoms     | 9.76  | 8.31  | N/A |
| Poor rotamers (%)         | 0.26  | 0     | N/A |
| Favored rotamers (%)      | 95.86 | 99.64 | N/A |
| Ramachandran outliers (%) | 0     | 0     | N/A |
| Ramachandran favored (%)  | 96.3  | 97.15 | N/A |
| MolProbity score          | 1.76  | 1.60  | N/A |
| Bad bonds (%)             | 0     | 0     | N/A |
| Bad angles (%)            | 0.03  | 0.01  | N/A |
