# Supplementary material for: Cryo-EM structures of human m6A writer complexes
Source: PubMed Central journal article supplement (PMC9652331; doi:10.1038/s41422-022-00725-8), 2022-09-27
Supplement: 41422_2022_725_MOESM12_ESM.pdf [file 41422_2022_725_MOESM12_ESM.pdf]

**Table S2. Interface statistics generated by PDBsum structure bioinformatics****analysis**

|                 | <b>No. of interface residues</b> | <b>Interface area (Å<sup>2</sup>)</b> | <b>No. of salt bridges</b> | <b>No. of hydrogen bonds</b> | <b>No. of non-bonded contacts</b> |
|-----------------|----------------------------------|---------------------------------------|----------------------------|------------------------------|-----------------------------------|
| VIRMA vs ZC3H13 | 102:73                           | 4209:4660                             | 7                          | 19                           | 416                               |
| VIRMA vs WTAPa  | 57:44                            | 2654:2902                             | 3                          | 15                           | 250                               |
| VIRMA vs WTAPb  | 59:45                            | 3055:3301                             | 3                          | 8                            | 249                               |
| ZC3H13 vs WTAPa | 6:5                              | 258:253                               | 1                          | 3                            | 32                                |
| WTAPa vs WTAPb  | 77:79                            | 4637:4603                             | 3                          | 8                            | 290                               |
