# Supplementary material for: Cryo-EM structures of human m6A writer complexes
Source: PubMed Central journal article supplement (PMC9652331; doi:10.1038/s41422-022-00725-8), 2022-09-27
Supplement: 41422_2022_725_MOESM13_ESM.pdf [file 41422_2022_725_MOESM13_ESM.pdf]

**Table S3. Cross-linking sites of MAC and MACOM**

| Protein1(site)-Protein2(site) | #Spec-Total | Best E-value | Sample          | Distance between Cα(A) | Remark           |
|-------------------------------|-------------|--------------|-----------------|------------------------|------------------|
| WTAP(123)-WTAP(125)           | 20          | 4.18E-30     | BS3-HWVZ        | 10.84                  | homodimeric link |
| WTAP(123)-WTAP(132)           | 4           | 1.30E-11     | BS3-HWVZ        | 14.2                   | homodimeric link |
| WTAP(132)-WTAP(134)           | 19          | 4.15E-10     | BS3-HWVZ        | 8.97                   | homodimeric link |
| WTAP(132)-WTAP(146)           | 28          | 4.61E-08     | BS3-HWVZ        | 21.65                  | homodimeric link |
| WTAP(134)-WTAP(146)           | 37          | 2.68E-22     | BS3-HWVZ        | 17.33                  | homodimeric link |
| WTAP(191)-WTAP(192)           | 10          | 3.83E-17     | BS3-HWVZ        | 11.26                  | homodimeric link |
| WTAP(61)-WTAP(61)             | 5           | 2.52E-09     | BS3-HWVZ        |                        | homodimeric link |
| WTAP(61)-WTAP(63)             | 52          | 5.26E-17     | BS3-HWVZ        |                        | homodimeric link |
| WTAP(132)-WTAP(133)           | 4           | 4.28E-04     | EDC-HWVZ        | 10.71                  | homodimeric link |
| WTAP(83)-WTAP(84)             | 3           | 7.24E-05     | EDC-HWVZ        | 6.71                   | homodimeric link |
| HAKAI (195)-ZC3H13(1167)      | 7           | 6.01E-05     | BS3-HWVZ+M3/M14 |                        |                  |
| HAKAI (195)-ZC3H13(1388)      | 4           | 1.81E-15     | BS3-HWVZ+M3/M14 |                        |                  |
| HAKAI (195)-WTAP(63)          | 3           | 1.58E-08     | BS3-HWVZ+M3/M14 |                        |                  |
| HAKAI (195)-WTAP(268)         | 3           | 8.32E-14     | BS3-HWVZ+M3/M14 |                        |                  |
| HAKAI (195)-WTAP(192)         | 3           | 1.26E-07     | BS3-HWVZ+M3/M14 |                        |                  |
| HAKAI (195)-WTAP(19)          | 10          | 2.44E-10     | BS3-HWVZ+M3/M14 |                        |                  |
| HAKAI (195)-VIRMA(899)        | 3           | 1.02E-07     | BS3-HWVZ+M3/M14 |                        |                  |
| HAKAI (195)-VIRMA(421)        | 3           | 4.21E-09     | BS3-HWVZ+M3/M14 |                        |                  |
| HAKAI (195)-VIRMA(1713)       | 6           | 1.42E-08     | BS3-HWVZ+M3/M14 |                        |                  |
| HAKAI (195)-METTL14(148)      | 3           | 1.69E-12     | BS3-HWVZ+M3/M14 |                        |                  |
| METTL3(27)-VIRMA(457)         | 7           | 9.97E-07     | BS3-HWVZ+M3/M14 |                        | *                |
| METTL3(576)-VIRMA(899)        | 3           | 3.63E-04     | BS3-HWVZ+M3/M14 |                        | *                |
| METTL3(576)-VIRMA(1613)       | 3           | 5.75E-09     | BS3-HWVZ+M3/M14 |                        |                  |
| METTL3(578)-VIRMA(1613)       | 3           | 3.35E-06     | BS3-HWVZ+M3/M14 |                        |                  |
| METTL3(578)-VIRMA(1713)       | 3           | 2.99E-03     | BS3-HWVZ+M3/M14 |                        |                  |
| METTL3(13)-WTAP(192)          | 14          | 1.28E-15     | BS3-HWVZ+M3/M14 |                        | *                |
| METTL3(27)-WTAP(230)          | 11          | 2.37E-29     | BS3-HWVZ+M3/M14 |                        | *                |
| METTL3(62)-WTAP(192)          | 5           | 5.54E-05     | BS3-HWVZ+M3/M14 |                        | *                |
| METTL3(132)-WTAP(192)         | 9           | 3.32E-34     | BS3-HWVZ+M3/M14 |                        | *                |
| METTL3(177)-WTAP(192)         | 11          | 7.52E-17     | BS3-HWVZ+M3/M14 |                        | *                |
| METTL3(177)-WTAP(155)         | 6           | 3.69E-09     | BS3-HWVZ+M3/M14 |                        | *                |
| METTL3(215)-WTAP(192)         | 5           | 8.18E-20     | BS3-HWVZ+M3/M14 |                        | *                |
| METTL3(215)-WTAP(160)         | 6           | 2.50E-06     | BS3-HWVZ+M3/M14 |                        | *                |
| METTL3(240)-WTAP(155)         | 3           | 3.47E-18     | BS3-HWVZ+M3/M14 |                        | *                |
| METTL3(241)-WTAP(160)         | 7           | 1.64E-07     | BS3-HWVZ+M3/M14 |                        | *                |
| METTL3(263)-WTAP(192)         | 3           | 7.83E-09     | BS3-HWVZ+M3/M14 |                        | *                |
| METTL3(263)-WTAP(160)         | 3           | 2.00E-07     | BS3-HWVZ+M3/M14 |                        | *                |
| METTL14(38)-VIRMA(399)        | 9           | 7.33E-19     | BS3-HWVZ+M3/M14 |                        | *                |
| METTL14(63)-VIRMA(880)        | 7           | 1.56E-16     | BS3-HWVZ+M3/M14 |                        | *                |
| METTL14(63)-VIRMA(899)        | 8           | 4.76E-23     | BS3-HWVZ+M3/M14 |                        | *                |
| METTL14(148)-VIRMA(880)       | 3           | 2.38E-19     | BS3-HWVZ+M3/M14 |                        | *                |
| METTL14(148)-VIRMA(887)       | 4           | 3.28E-12     | BS3-HWVZ+M3/M14 |                        | *                |
| METTL14(148)-VIRMA(1613)      | 4           | 6.64E-12     | BS3-HWVZ+M3/M14 |                        |                  |
| METTL14(148)-VIRMA(899)       | 4           | 2.29E-08     | BS3-HWVZ+M3/M14 |                        | *                |
| METTL14(63)-WTAP(192)         | 9           | 1.59E-13     | BS3-HWVZ+M3/M14 |                        | *                |
| METTL14(148)-WTAP(192)        | 7           | 4.46E-19     | BS3-HWVZ+M3/M14 |                        | *                |
| METTL14(148)-ZC3H13(1255)     | 5           | 8.22E-14     | BS3-HWVZ+M3/M14 |                        |                  |
| METTL14(148)-HAKAI(195)       | 3           | 1.69E-12     | BS3-HWVZ+M3/M14 |                        |                  |
| METTL3(130)-ZC3H13(1182)      | 3           | 6.11E-09     | EDC-HWVZ+M3/M14 |                        | *                |
| METTL3(130)-ZC3H13(1509)      | 5           | 1.97E-11     | EDC-HWVZ+M3/M14 |                        | *                |
| METTL3(132)-ZC3H13(1554)      | 3           | 6.46E-07     | EDC-HWVZ+M3/M14 |                        | *                |
| METTL3(289)-WTAP(155)         | 7           | 6.00E-22     | EDC-HWVZ+M3/M14 |                        | *                |
| METTL3(256)-WTAP(170)         | 4           | 2.43E-05     | EDC-HWVZ+M3/M14 |                        | *                |
| METTL3(235)-WTAP(170)         | 3           | 4.19E-04     | EDC-HWVZ+M3/M14 |                        | *                |
| METTL3(130)-WTAP(192)         | 4           | 3.51E-22     | EDC-HWVZ+M3/M14 |                        | *                |
| METTL3(132)-WTAP(170)         | 5           | 3.25E-22     | EDC-HWVZ+M3/M14 |                        | *                |
| METTL3(139)-WTAP(192)         | 3           | 1.67E-08     | EDC-HWVZ+M3/M14 |                        | *                |
| METTL3(289)-VIRMA(899)        | 5           | 9.48E-10     | EDC-HWVZ+M3/M14 |                        | *                |

\*the visible MAC-cross-linked site in the HWVZ structure
